# Supplementary material
Source: HighWire-hosted journal article supplement (https://erj.ersjournals.com/content/55/4/2000398)
Supplement: inline-supplementary-material-1 [file inline-supplementary-material-1.pdf]

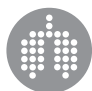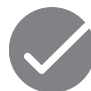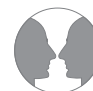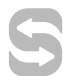

SHAREABLE PDF

# The clinical dynamics of 18 cases of COVID-19 outside of Wuhan, China

Lei Wang<sup>1,2</sup>, Yong-hua Gao<sup>1,2</sup>, Li-Li Lou<sup>1</sup> and Guo-Jun Zhang<sup>1</sup>

**Affiliations:** <sup>1</sup>Dept of Respiratory and Critical Care Medicine, The First Affiliated Hospital of Zhengzhou University, Zhengzhou, China. <sup>2</sup>Both authors contributed equally as first authors.

**Correspondence:** Yong-hua Gao, Dept of Respiratory and Critical Care Medicine, The First Affiliated Hospital of Zhengzhou University, Zhengzhou, Henan, China. E-mail: gaoyonghuahust@163.com

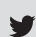

@ERSpublications

**SARS-CoV-2 can be transmitted from person to person, with infection ranging from mild disease to severe pneumonia and radiological abnormalities on chest CT for most patients, improving after RT-PCR conversion** <http://bit.ly/2TiMSck>

**Cite this article as:** Wang L, Gao Y-hua, Lou L-L, *et al.* The clinical dynamics of 18 cases of COVID-19 outside of Wuhan, China. *Eur Respir J* 2020; 55: 2000398 [<https://doi.org/10.1183/13993003.00398-2020>].

This single-page version can be shared freely online.

## *To the Editor:*

Since an outbreak of coronavirus disease 2019 (COVID-19) in Wuhan, China, and related regions of the Hubei province, an increasing number of exported cases have been confirmed in other provinces of China and in multiple countries around the world, with substantial morbidity and mortality [1–4]. The World Health Organization (WHO) has declared a public health emergency of international concern considering rapid increases in numbers of confirmed cases in China and additional countries. As of 22 February 2020, a total of 12938 patients had been confirmed outside of Wuhan and related regions of the Hubei province of China [1]. However, there is limited information about COVID-19 outside of Wuhan [5], and no study has reported the time to real-time PCR conversion and radiological changes after treatment.
